# Supplementary material for: Curcumin longa extract-loaded nanoemulsion improves the survival of endotoxemic mice by inhibiting nitric oxide-dependent HMGB1 release
Source: PeerJ. 2017 Sep 14;5:e3808. doi: 10.7717/peerj.3808 (PMC5600948; doi:10.7717/peerj.3808)
Supplement: Supplemental Information 2 — Raw and statistical data of MTT assay for Fig. 2A. [file peerj-05-3808-s002.xlsx]

## Sheet: Sheet1
RAW data
Figure2A
dose	0	0.1	1	5	10	20
n=1	2.183	2.169	2.08	2.001	1.74	1.285
n=2	2.122	1.773	1.822	1.991	1.48	1.456
n=3	2.016	1.816	2.191	1.815	1.82	1.571
n=4	2.022	2.183	1.988	1.667	1.46	1.181
average	2.0858	1.9853	2.0203	1.8685	1.625	1.3733
S.E	0.0405	0.1105	0.078	0.0796	0.0911	0.0869
