# Supplementary material for: Curcumin longa extract-loaded nanoemulsion improves the survival of endotoxemic mice by inhibiting nitric oxide-dependent HMGB1 release
Source: PeerJ. 2017 Sep 14;5:e3808. doi: 10.7717/peerj.3808 (PMC5600948; doi:10.7717/peerj.3808)
Supplement: Supplemental Information 3 — Raw and statistical data for the ratios of HMGB1 to Ponceau S of Fig. 2B. [file peerj-05-3808-s003.xlsx]

## Sheet: Sheet1
RAW data
Figure 2B
HMGB1	Ponceau S	HMGB1/Ponceau S	fold		HMGB1	Ponceau S	HMGB1/Ponceau S	fold		HMGB1	Ponceau S	HMGB1/Ponceau S	fold
6244.79	24337.1	0.256596	1		917.083	17897	0.0512421	1		3790.48	31107.6	0.121851	1
33234.4	25979.8	1.27924	4.98543		20570.4	37373.6	0.5504	10.7411		25649.7	28858.7	0.888802	7.29419
16847.6	29028.2	0.580386	2.26187		11178.7	35993	0.31058	6.06102		5201.51	19800.1	0.262702	2.15593
9139.1	28114.6	0.325066	1.26684		975.083	16901.5	0.0576922	1.12587		3795.4	13945.5	0.27216	2.23356
