# Supplementary material for: Curcumin longa extract-loaded nanoemulsion improves the survival of endotoxemic mice by inhibiting nitric oxide-dependent HMGB1 release
Source: PeerJ. 2017 Sep 14;5:e3808. doi: 10.7717/peerj.3808 (PMC5600948; doi:10.7717/peerj.3808)
Supplement: Supplemental Information 4 — Raw and statistical data of nitrite measured by Griess reagent in condition media for Fig. 3A. [file peerj-05-3808-s004.xlsx]

## Sheet: Sheet1
RAW data
Figure 3A
CLEN	C	LPS	0.1	0.5	1	5
n=1	0.031	0.17	0.15	0.14	0.13	0.097
n=2	0.034	0.15	0.16	0.15	0.13	0.095
n=3	0.031	0.18	0.18	0.17	0.15	0.096
n=4	0.029	0.16	0.15	0.15	0.14	0.095
uM	0	20	40	60	80	100
Standard curve	0.035	0.18	0.405	0.605	0.77	0.974
n=1	1.28421	15.9158	13.8105	12.7579	11.7053	8.23158
n=2	1.6	13.8105	14.8632	13.8105	11.7053	8.02105
n=3	1.28421	16.9684	16.9684	15.9158	13.8105	8.12632
n=4	1.07368	14.8632	13.8105	13.8105	12.7579	8.02105
Ave	1.3105	15.3895	14.8632	14.0737	12.4947	8.1
SE	0.1085	0.6795	0.7443	0.6623	0.5039	0.0504
