# Supplementary material for: Curcumin longa extract-loaded nanoemulsion improves the survival of endotoxemic mice by inhibiting nitric oxide-dependent HMGB1 release
Source: PeerJ. 2017 Sep 14;5:e3808. doi: 10.7717/peerj.3808 (PMC5600948; doi:10.7717/peerj.3808)
Supplement: Supplemental Information 5 — Raw and statistical data for the ratios of iNOS to b -actin of Fig. 3B. [file peerj-05-3808-s005.xlsx]

## Sheet: Sheet1
RAW data
Figure 3B
	inos	actin	inos/actin	fold		inos	actin	inos/actin	fold		inos	actin	inos/actin	fold
1	12447.1	42872.2	0.290331	1	1	3915.73	43065.5	0.0909249	1	1	2200.44	38401.1	0.0573015	1
2	55683.2	45713.1	1.2181	4.19556	2	26159.8	45530.4	0.574556	6.31901	2	8841.75	30795.9	0.287109	5.01049
3	16319.5	42891.9	0.380479	1.3105	3	8126.21	41845.4	0.194196	2.13578	3	3029.8	28310	0.107022	1.86771
4	14557.7	48431.8	0.300581	1.0353	4	7586.61	43066.7	0.17616	1.93742	4	5267.66	38717.8	0.136053	2.37433
