# Supplementary material for: Curcumin longa extract-loaded nanoemulsion improves the survival of endotoxemic mice by inhibiting nitric oxide-dependent HMGB1 release
Source: PeerJ. 2017 Sep 14;5:e3808. doi: 10.7717/peerj.3808 (PMC5600948; doi:10.7717/peerj.3808)
Supplement: Supplemental Information 10 — Raw and statistical data of nitrite measured by Griess reagent in condition media for Fig. 5A. [file peerj-05-3808-s010.xlsx]

## Sheet: Sheet1
RAW data
Figure 5A
CLEN	C	LPS	CLEN	LPS+CLEN+SP	LPS+SP	CLEN	SP600125
n=1	0.03	0.18	0.087	0.067	0.057	0.021	0.031
n=2	0.031	0.15	0.09	0.074	0.055	0.022	0.029
n=3	0.034	0.17	0.096	0.066	0.046	0.027	0.027
n=4	0.033	0.18	0.099	0.069	0.056	0.029	0.03
uM	0	20	40	60	80	100	100
Standard curve	0.035	0.18	0.405	0.605	0.77	0.974	0.974
n=1	1.22105	17.0105	7.22105	5.11579	4.06316	0.273684	1.32632
n=2	1.32632	13.8526	7.53684	5.85263	3.85263	0.378947	1.11579
n=3	1.64211	15.9579	8.16842	5.01053	2.90526	0.905263	0.905263
n=4	1.53684	17.0105	8.48421	5.32632	3.95789	1.11579	1.22105
Ave	1.4316	15.9579	7.8526	5.3263	3.6947	0.6684	1.1421
SE	0.0961	0.7443	0.2883	0.1873	0.2666	0.2033	0.0899
