# Supplementary material for: Curcumin longa extract-loaded nanoemulsion improves the survival of endotoxemic mice by inhibiting nitric oxide-dependent HMGB1 release
Source: PeerJ. 2017 Sep 14;5:e3808. doi: 10.7717/peerj.3808 (PMC5600948; doi:10.7717/peerj.3808)
Supplement: Supplemental Information 11 — Raw and statistical data for the ratios of iNOS and HMGB1 to each control of Fig. 5B. [file peerj-05-3808-s011.xlsx]

## Sheet: Sheet1
RAW data
Figure 5B
	iNOS	actin	inos/actin	fold		iNOS	actin	inos/actin	fold		iNOS	actin	inos/actin	fold
1	1162.98	13768.3	0.0844683	1	1	2250.72	19023.9	0.11831	1	1	5276.28	19418.5	0.271714	1
2	10648.3	15524.7	0.685894	8.12014	2	21458.1	22335.1	0.960738	8.1205	2	40191.2	21669.9	1.8547	6.82595
3	6890.59	12501.1	0.551201	6.52553	3	14761.5	21860.8	0.675252	5.70747	3	23728.6	20127.8	1.1789	4.33875
4	5157.64	15673.1	0.329077	3.89586	4	9307.4	17928.9	0.519127	4.38785	4	10270.3	22814.5	0.450167	1.65677
5	3708.18	19699.8	0.188235	2.22846	5	8048.35	19926.5	0.403901	3.41392	5	7529.81	23381.2	0.322045	1.18524
6	390.991	20993.8	0.0186242	0.220487	6	1050.28	19813.5	0.0530081	0.448043	6	1617.74	22293.5	0.0725655	0.267066
7	522.062	22753.8	0.0229439	0.271627	7	1801.57	20398.6	0.0883181	0.746496	7	1393.15	23499.1	0.0592855	0.218191
	HMGB1	PonS	HMGB1/PonS	fold		HMGB1	PonS	HMGB1/PonS	fold		HMGB1	PonS	HMGB1/PonS	fold
1	3415.28	25470.6	0.134087	1	1	2687.69	22729	0.118249	1	1	7834.4	24993.4	0.313458	1
2	15533.1	22000	0.706048	5.26561	2	16704.1	23280.7	0.717509	6.06777	2	40382.7	23540.5	1.71546	5.47268
3	8176.35	29292	0.279132	2.08173	3	6265.33	24286.2	0.257979	2.18165	3	22534.3	25395.3	0.887341	2.83081
4	1326.86	26898.4	0.0493286	0.367886	4	2254.69	24509.9	0.0919911	0.777943	4	10972.2	26386.8	0.41582	1.32656
5	781.083	24350.4	0.0320768	0.239224	5	1674.57	22930.4	0.0730282	0.617579	5	4619.52	24943.4	0.1852	0.590828
6	270.749	24140.7	0.0112155	0.0836433	6	1723.64	25132.6	0.0685817	0.579976	6	4784.98	27358.1	0.174902	0.557975
7	1370.96	22124.4	0.0619659	0.462133	7	1243.74	23577.9	0.0527503	0.446095	7	2184.33	26030.9	0.0839129	0.267701
