# Supplementary material for: Curcumin longa extract-loaded nanoemulsion improves the survival of endotoxemic mice by inhibiting nitric oxide-dependent HMGB1 release
Source: PeerJ. 2017 Sep 14;5:e3808. doi: 10.7717/peerj.3808 (PMC5600948; doi:10.7717/peerj.3808)
Supplement: Supplemental Information 12 — Raw and statistical data for survival rates (%) of mice challenged by LPS and CLEN of Fig. 6A. [file peerj-05-3808-s012.xlsx]

## Sheet: Sheet1
RAW data
Figure 6A
	0	24	48	72	96	120	Ave	SE
C	6	6	6	6	6	6	6	0
LPS	6	2	1	0	0	0	1.5	0.9574
L+CE	6	5	3	3	3	3	3.8333	0.5426
CE	6	6	6	6	6	6	6	0
