# Supplementary material for: Curcumin longa extract-loaded nanoemulsion improves the survival of endotoxemic mice by inhibiting nitric oxide-dependent HMGB1 release
Source: PeerJ. 2017 Sep 14;5:e3808. doi: 10.7717/peerj.3808 (PMC5600948; doi:10.7717/peerj.3808)
Supplement: Supplemental Information 13 — Raw and statistical data for survival rates (%) of mice challenged by LPS, CLEN and SNP of Fig. 6B. [file peerj-05-3808-s013.xlsx]

## Sheet: Sheet1
RAW data
Figure 6B
	0	24	48	72	96	120	S.E	average
C	6	6	6	6	6	6	6	0
LPS	6	2	1	0	0	0	1.5	0.9574
L+CLEN	6	4	3	3	3	3	3.6667	0.4944
L+CLEN+SNP	6	1	1	0	0	0	1.3333	0.9545
L+SNP	6	1	0	0	0	0	1.1667	0.9804
CLEN	6	6	6	6	6	6	6	0
SNP	6	6	6	6	6	6	6	0
